# Supplementary material for: Interlayer bismuthene as a charge-transporter improves the photoelectrochemical water oxidation activity of a bismuth vanadate metal–organic framework
Source: Royal Society of Chemistry journal article supplement (doi:10.1039/d5cc04966k), 2025-11-18
Supplement: d5cc04966k1.pdf [file d5cc04966k1.pdf]

## Supporting information

### **Inter-layer bismuthene as a charge-transporter improves photoelectrochemical water oxidation activity of bismuth vanadate-metal-organic framework**

Deepak Kumar,<sup>a</sup> Sagnik Mukherjee,<sup>a</sup> Arindam Indra<sup>a\*</sup>

<sup>a</sup>*Department of Chemistry, Indian Institute of Technology (BHU), Varanasi, UP-221005, India*

*E-mail: [arindam.chy@iitbhu.ac.in](mailto:arindam.chy@iitbhu.ac.in)*

## Chemicals

Bismuth nitrate pentahydrate, dimethyl formamide (DMF), potassium iodide, dimethyl sulfoxide (DMSO), sodium hydroxide, sodium borohydride, sodium dihydrogen phosphate, disodium hydrogen phosphate, isopropanol, and chloranilic acid were procured from MERCK Life Sciences Pvt. Ltd., India. Vanadyl acetylacetonate was purchased from SRL Pvt. Ltd., India. Nickel chloride hexahydrate, was purchased from SD Fine Pvt. Ltd., India. *Para*-benzoquinone was purchased from Loba Chemie Pvt. Ltd., India, and Ethanol (99%) was procured from Chengdu, China. Fluorine-doped tin oxide (FTO,  $1 \times 2 \text{ cm}^2$ , resistivity  $\sim 7 \Omega/\text{sq}$ ) was purchased from Sigma. Double-distilled water was utilized for washing, synthesis, and electrochemical measurements. The chemicals were used as received without further purification.

## Instruments

Rigaku Smart Lab 9 kW Powder X-ray diffractometer with  $\text{Cu-K}_\alpha$  ( $\lambda = 1.5418 \text{ \AA}$ ) radiation was used for PXRD measurements in the  $5^\circ < 2\theta < 90^\circ$  range.

Scanning electron microscopy (SEM) was recorded on EVO-Scanning Electron Microscope MA15/18 from CARL ZEISS MICROSCOPY LTD. Energy-dispersive X-ray (EDX) and elemental mapping analysis were performed in Oxford Instruments Nanoanalysis (51N1000). Transmission electron microscopic (TEM) studies were performed in Tecnai G2 F30 TWIN from FEI Company of USA (SEA) PTE, LTD. A piece of the photoanode@FTO was sonicated in 2 mL ethanol for 10 minutes and drop cast on a Cu grid for TEM measurements.

Raman spectroscopy was carried out on an alpha 300 confocal Raman microscope (WITec, Germany) with a spectral resolution of  $\sim 1 \text{ cm}^{-1}$ . A 785 nm laser served as the excitation source, operated at 1–2 mW on the sample surface to minimize thermal effects, with an acquisition time of 10 s.

Solid-state UV-vis reflectance spectroscopy was performed using a UV-2600 spectrophotometer (Shimadzu; Japan) from 200 to 800 nm. Photoluminescence spectra were acquired with a Fluorolog FL-3-11 by Horiba Jobin-Yvon.

X-ray photoelectron spectroscopy (XPS) was performed using a  $\text{K}_\alpha$  Thermo Fisher Scientific X-ray photoelectron spectrometer. Origin 8.5 software was used to analyze the XPS data.

A Metrohm Autolab M204 electrochemical workstation was used to perform the photoelectrochemical and electrochemical measurements.

## Experimental

### Fabrication of the photoanode $\text{BiVO}_4/\text{FTO}$ <sup>1</sup>

2.3 mmol *para*-benzoquinone was taken in 10 mL ethanol and stirred for 30 minutes. 0.01 mol of potassium iodide was added to 25 mL of double-distilled water to prepare a solution. 1.0 mmol bismuth nitrate pentahydrate was added to potassium iodide solution and stirred for 10 minutes, followed by the addition of *para*-benzoquinone solution and stirred for 15 minutes. The brownish-red color of bismuth oxyiodide ( $\text{BiOI}$ ) was formed. The pH of the solution was maintained below 2 by the addition of nitric acid. For the electrodeposition of  $\text{BiOI}$ , FTO was used as the working electrode,  $\text{Ag}/\text{AgCl}$  as the reference electrode, and Pt wire as the counter electrode. A cathodic potential of -0.2 V vs.  $\text{Ag}/\text{AgCl}$  electrode was applied for 120 seconds to get a uniform film of  $\text{BiOI}$  on FTO. The

BiOI film was dried for 1 hour at 60 °C in an air oven. Next, the BiOI on FTO film was dipped in a 0.2 M solution of vanadyl acetylacetonate in dimethyl sulfoxide and taken out immediately. The film was calcined at 450 °C (ramp rate of 2 °C/minute) in a tubular furnace followed by natural cooling. The yellow-greenish films on FTO were soaked in 1.0 M NaOH solution for 15 minutes to remove the vanadium pentoxide formed during calcination. After washing with distilled water and drying, the yellow-colored bismuth vanadate film on FTO was obtained.<sup>1</sup>

### Synthesis of bismuthene<sup>2</sup>

In a round-bottom flask, 0.5 mmol bismuth nitrate pentahydrate was dissolved in 15 mL ethylene glycol by sonication to get a transparent solution. The solution was purged with argon (Ar) gas and stirred for 30 minutes at 120 °C. The solution was kept at room temperature in an argon atmosphere. In 5 mL of water, 20 mmol of sodium borohydride was dissolved in an Ar atmosphere and dropwise added to the Bi<sup>3+</sup> solution using a syringe. A black precipitate appeared, and after the addition of the whole sodium borohydride solution (10 minutes), the black precipitate was immediately collected through centrifugation (10,000 RPM, 5 minutes). The solid was washed with ethanol three times and kept under vacuum for drying at room temperature.<sup>2</sup>

### Synthesis of nickel chloranilic acid MOF (Ni-MOF)

0.1 mmol chloranilic acid (in 5 mL DMF) was added to 0.1 mmol nickel chloride hexahydrate (in 5 mL DMF) and sonicated for 10 minutes. The suspension was transferred to a Teflon cup and solvothermally treated at 120 °C for 6 hours. The MOF was collected via centrifugation (8000 RPM, 5 minutes), washed with water (3 times) and ethanol (2 times), and dried in an oven at 60 °C overnight.<sup>3</sup>

### Photoanode fabrication

(i) 10 mg bismuthene was dispersed in 10 mL of ethanol by sonication for 15 minutes. BiVO<sub>4</sub>@FTO was immersed in bismuthene dispersion for 5 minutes and dried in a vacuum to get BiVO<sub>4</sub>/Bi.

(ii) 5 mg of Ni-MOF was dispersed in 10 mL of ethanol by sonication for 15 minutes. The BiVO<sub>4</sub>/Bi photoanode was immersed in a mixture for 5 minutes and dried in a vacuum to obtain BiVO<sub>4</sub>/Bi/Ni-MOF. The photoanodes were kept in a vacuum for drying.

Similarly, other photoanodes were prepared as shown in Table S1.

**Table S1. Modified photoanodes used for the PEC water splitting.**

| No. | Catalyst system                                             | Catalyst name                |
|-----|-------------------------------------------------------------|------------------------------|
| 1.  | BiVO <sub>4</sub>                                           | BiVO <sub>4</sub>            |
| 2.  | Bismuthene                                                  | Bi                           |
| 3.  | Nickel-chloranilate framework                               | Ni-MOF                       |
| 4.  | BiVO <sub>4</sub> /Bismuthene                               | BiVO <sub>4</sub> /Bi        |
| 5.  | BiVO <sub>4</sub> /Nickel-chloranilate framework            | BiVO <sub>4</sub> /Ni-MOF    |
| 6.  | BiVO <sub>4</sub> /Bismuthene/Nickel-chloranilate framework | BiVO <sub>4</sub> /Bi/Ni-MOF |

### Photoelectrochemical and electrochemical measurements

All electrochemical measurements were carried out in a single-compartment photoelectrolytic cell having 25 mL electrolyte (0.5 M phosphate buffer solution with pH 7) with the photoanode@FTO as the working electrode, Ag/AgCl as the reference electrode, and Pt wire as the counter electrode. A Metrohm Autolab M204 electrochemical workstation was used to perform the photoelectrochemical measurements. Visible light (Orient Electric) was used for PEC measurements. All potentials were converted to the reversible hydrogen electrode (RHE) using the following equation:

$$E_{(RHE)} = E_{(Ag/AgCl)} + 0.0591pH + 0.197$$

Chopped light current-time (i-t) curves were recorded with an alternating light on/off irradiation at every 30s with an applied potential of 1.23 V vs. RHE.

Electrochemical impedance spectroscopic (EIS) measurements were carried out in the frequency range of 0.001 to 100,000 Hz with an amplitude of 20 mV in the dark and light. The charge transfer resistance ( $R_{ct}$ ) was calculated based on the semicircle diameter observed in the Nyquist plots.

Mott-Schottky (M-S) plots were recorded over an AC frequency of 0.5 kHz, 1.0 kHz, and 1.5 kHz in the dark with the applied bias ranging from -0.28 to 1.5 V vs. RHE.

The applied bias photon-to-current efficiency (ABPE) was calculated according to the equation:

$$ABPE(\%) = \frac{(1.23-V) \times J}{P} \times 100\%$$

Where J is the photocurrent density ( $\text{mA cm}^{-2}$ ), V is the applied bias (V vs. RHE), and P is the incident light density ( $100 \text{ mW cm}^{-2}$ ).

The incident photon-to-current conversion efficiency (IPCE) was performed under monochromatic irradiation from a Xe lamp at 1.23 V vs. RHE according to the following equation:

$$IPCE(\%) = \frac{1240 \times J(\lambda)}{P(\lambda) \lambda} \times 100\%$$

Where  $J(\lambda)$ ,  $\lambda$ , and  $P(\lambda)$  are photocurrent density ( $\text{mA cm}^{-2}$ ), wavelength of light (nm), and power density of monochromatic light ( $\text{mW cm}^{-2}$ ), respectively.<sup>1</sup>

## Figures

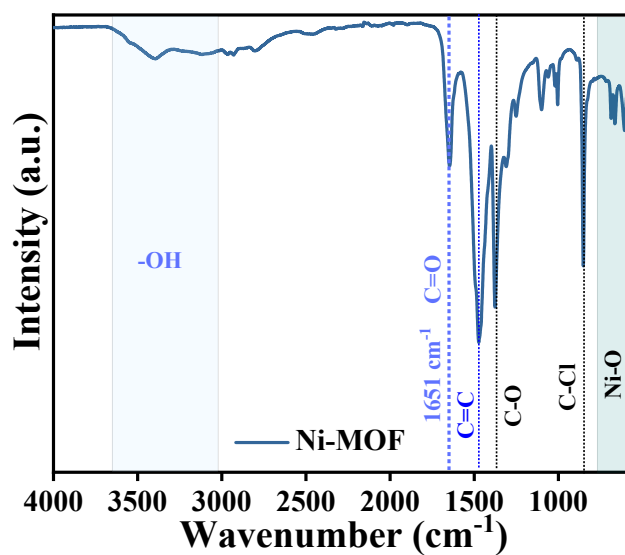

**Figure S1.** The attenuated total reflection Fourier-transformed infrared (ATR-FTIR) spectrum of Ni-MOF<sup>3</sup> showing characteristic peaks: broad O–H stretching at 3500–3200  $\text{cm}^{-1}$ , quinone C=O stretch at 1651  $\text{cm}^{-1}$ , aromatic C=C stretches at 1600–1500  $\text{cm}^{-1}$ , C–O stretches at 1400–1200  $\text{cm}^{-1}$ , aromatic ring vibrations at 1200–1000  $\text{cm}^{-1}$ , C–Cl stretching at 850  $\text{cm}^{-1}$ , and Ni–O vibrations at 500–800  $\text{cm}^{-1}$ . Aromatic C–H stretching appears near 3100–3000  $\text{cm}^{-1}$ .

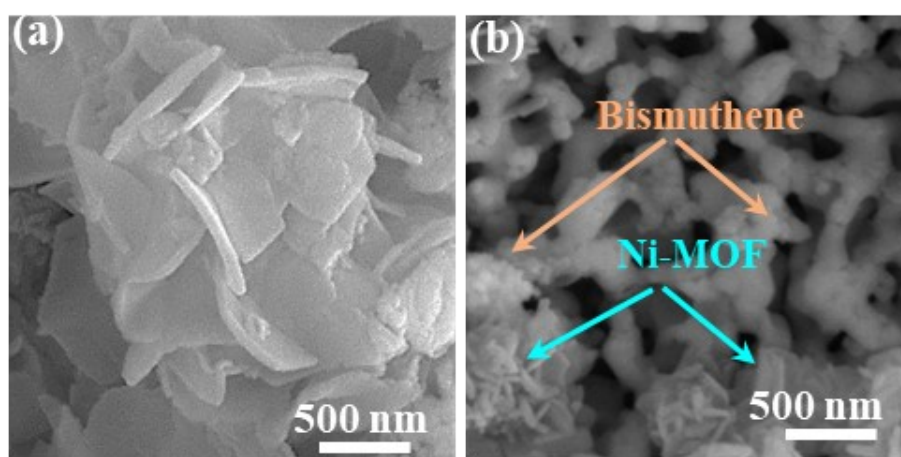

**Figure S2.** Scanning electron microscope (SEM) images of the photoanodes: (a) Ni-MOF, (b) BiVO<sub>4</sub>/Bi/Ni-MOF.

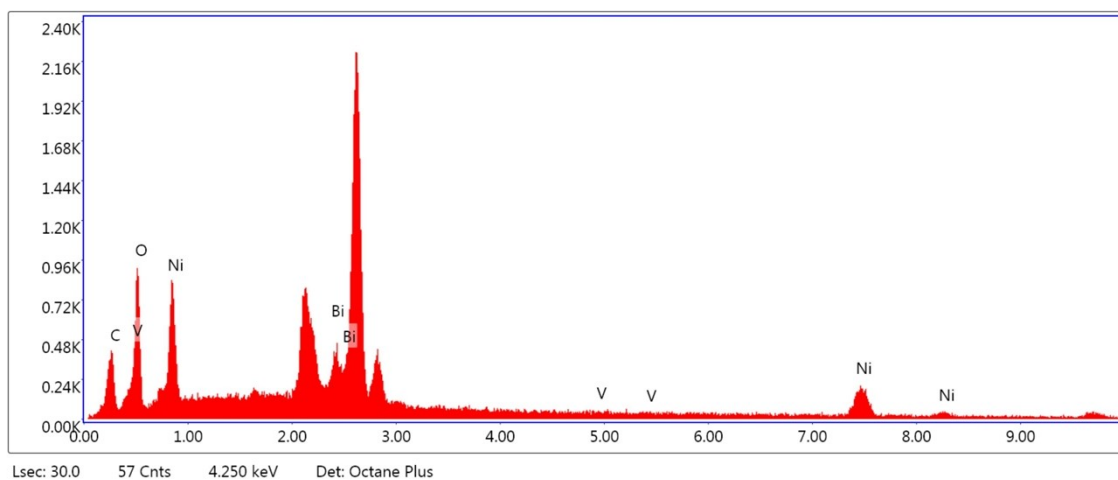

**Figure S3.** Energy dispersive X-ray spectrum of  $\text{BiVO}_4/\text{Bi/Ni-MOF}$  showing the presence of elements Bi, V, Ni, and O.

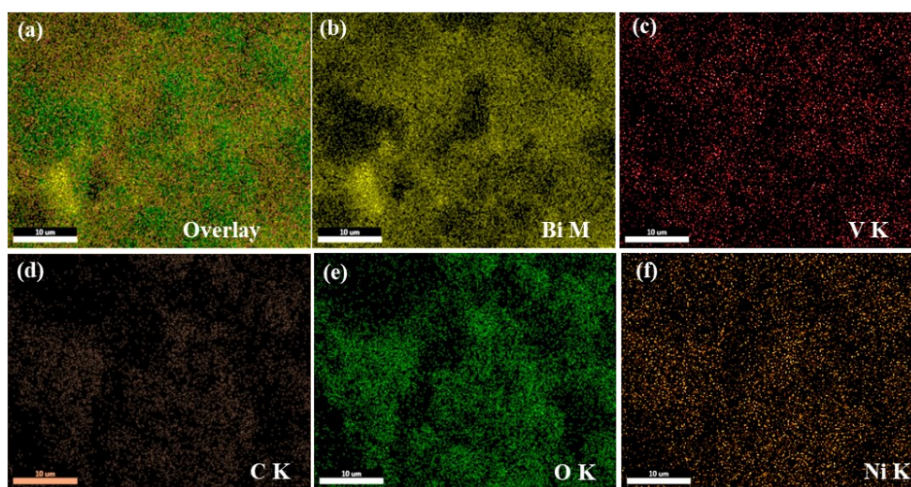

**Figure S4.** Elemental mapping of  $\text{BiVO}_4/\text{Bi/Ni-MOF}$  showing the presence of elements Bi, V, Ni, O, and C (scale: 10 μm).

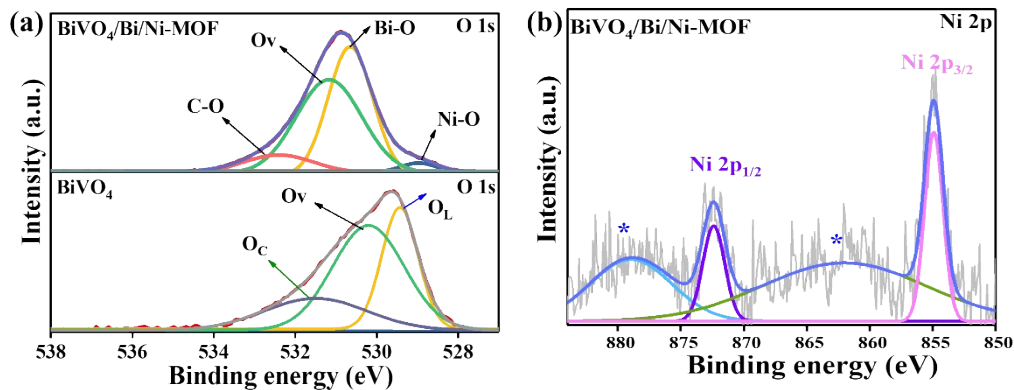

**Figure S5.** X-ray photoelectron spectra of  $\text{BiVO}_4$  compared with  $\text{BiVO}_4/\text{Bi/Ni-MOF}$ . (a) O 1s spectrum, The O 1s XPS of  $\text{BiVO}_4$  was fitted into three peaks. The XPS of  $\text{BiVO}_4/\text{Bi/Ni-MOF}$  were fitted into three peaks for Ni-O, Bi-O, oxygen vacancy ( $\text{O}_v$ ), and -CO groups,<sup>4</sup> (b) Ni 2p XPS of  $\text{BiVO}_4/\text{Bi/Ni-MOF}$  was fitted into two peaks, corresponding to Ni  $2p_{3/2}$  and Ni  $2p_{1/2}$ .

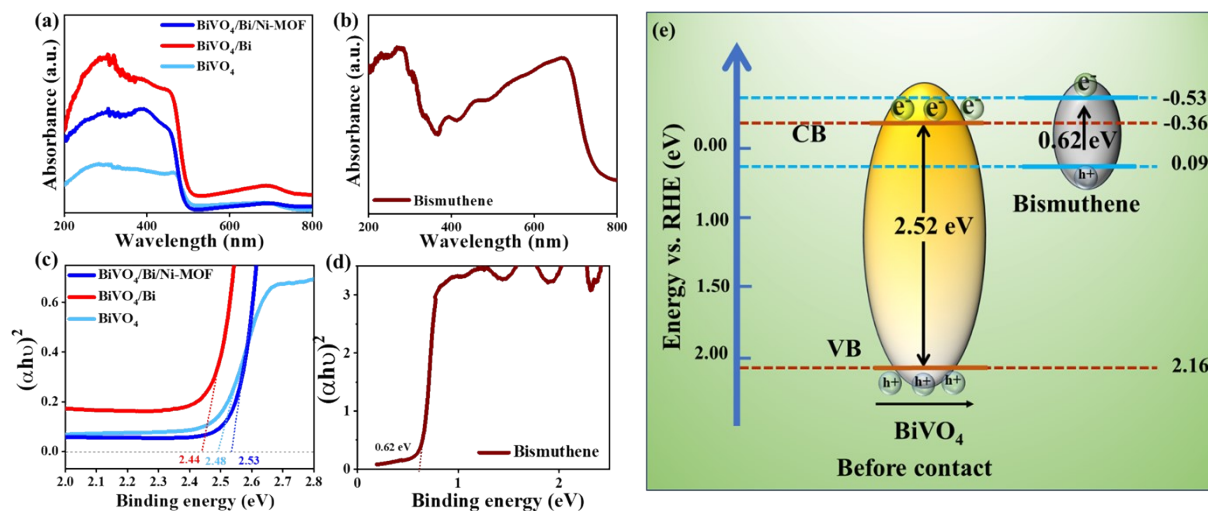

**Figure S6.** (a) UV-Vis spectra of  $\text{BiVO}_4$ ,  $\text{BiVO}_4/\text{Bi}$ , and  $\text{BiVO}_4/\text{Bi/Ni-MOF}$  photoanodes. (b) UV-Vis spectrum of bismuthene, (c) Tauc plots of  $\text{BiVO}_4$ ,  $\text{BiVO}_4/\text{Bi}$ , and  $\text{BiVO}_4/\text{Bi/Ni-MOF}$  revealing the band gap to be 2.48 eV, 2.44 eV, and 2.53 eV, respectively, (d) Tauc plot showing the band gap of bismuthene to be 0.62 eV, (e) Band alignment in  $\text{BiVO}_4$  and bismuthene.

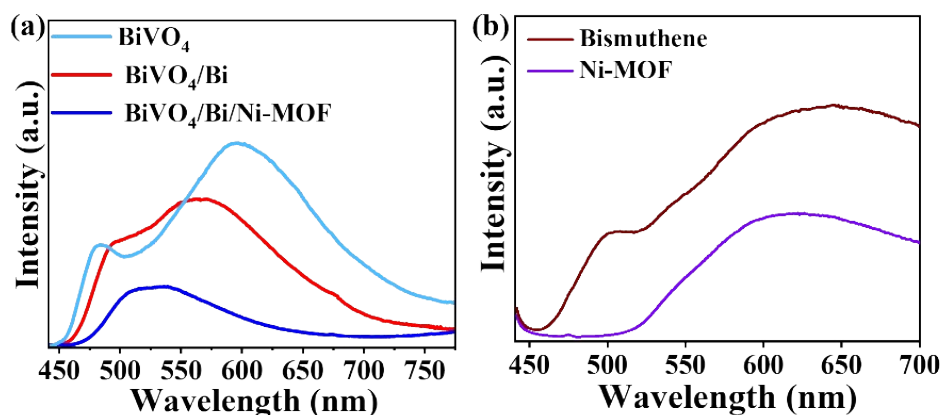

**Figure S7.** (a-b) PL emission spectra of BiVO<sub>4</sub> and modified photoanodes. BiVO<sub>4</sub> emits at 480 nm and 590 nm, while BiVO<sub>4</sub>/Bi/Ni-MOF shows emission peaks at 510 nm and 538 nm. The shift in the two fluorescence peaks in BiVO<sub>4</sub> and BiVO<sub>4</sub>/Bi/Ni-MOF compared to the BiVO<sub>4</sub>/Bi and BiVO<sub>4</sub>/Ni-MOF can be explained by the charge transfer from BiVO<sub>4</sub> to Ni-MOF. A significant change in the emission peak  $\lambda_{\text{max}}$  was observed by the loading of bismuthene and Ni-MOF on BiVO<sub>4</sub> because of the strong electronic interaction between the components.

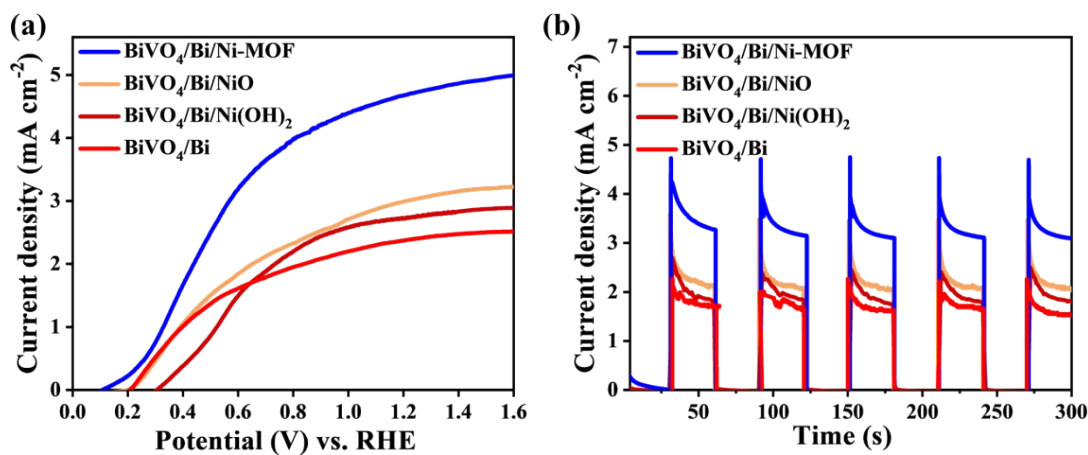

**Figure S8.** (a) LSV profiles of BiVO<sub>4</sub>/Bi photoanodes modified with Ni-based cocatalysts (NiO, Ni(OH)<sub>2</sub>, and Ni-MOF) in phosphate buffer in the presence of light. (b) Photocurrent of all BiVO<sub>4</sub>/Bi/Ni-Based (NiO, Ni(OH)<sub>2</sub>, and Ni-MOF) at 1.23 V vs. RHE. While BiVO<sub>4</sub>/Bi/NiO and BiVO<sub>4</sub>/Bi/Ni(OH)<sub>2</sub> improve PEC activity compared to bare BiVO<sub>4</sub>/Bi, BiVO<sub>4</sub>/Bi/Ni-MOF delivers the highest activity, highlighting the role of MOF as a cocatalyst.



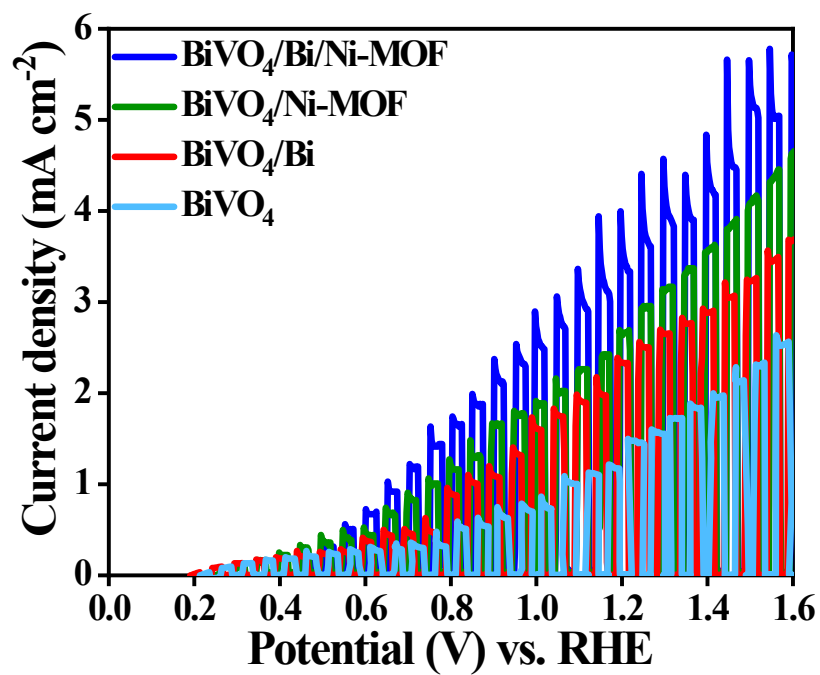

**Figure S9.** Photocurrent density-voltage curves of all the photoanodes with chopped illumination.

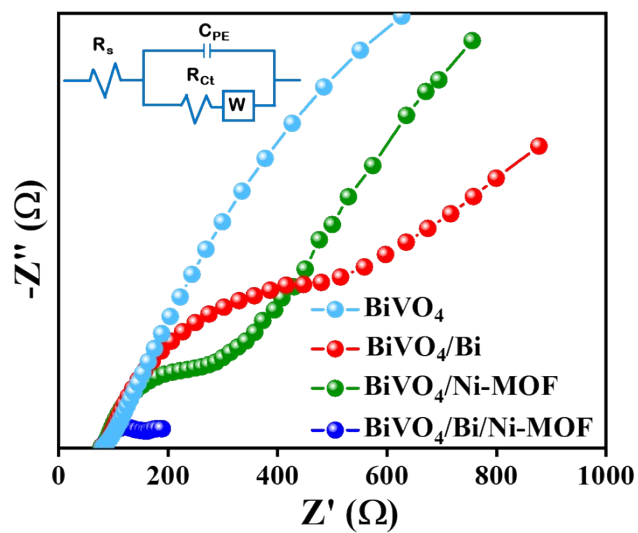

**Figure S10.** EIS of all photoanodes in the presence of light.

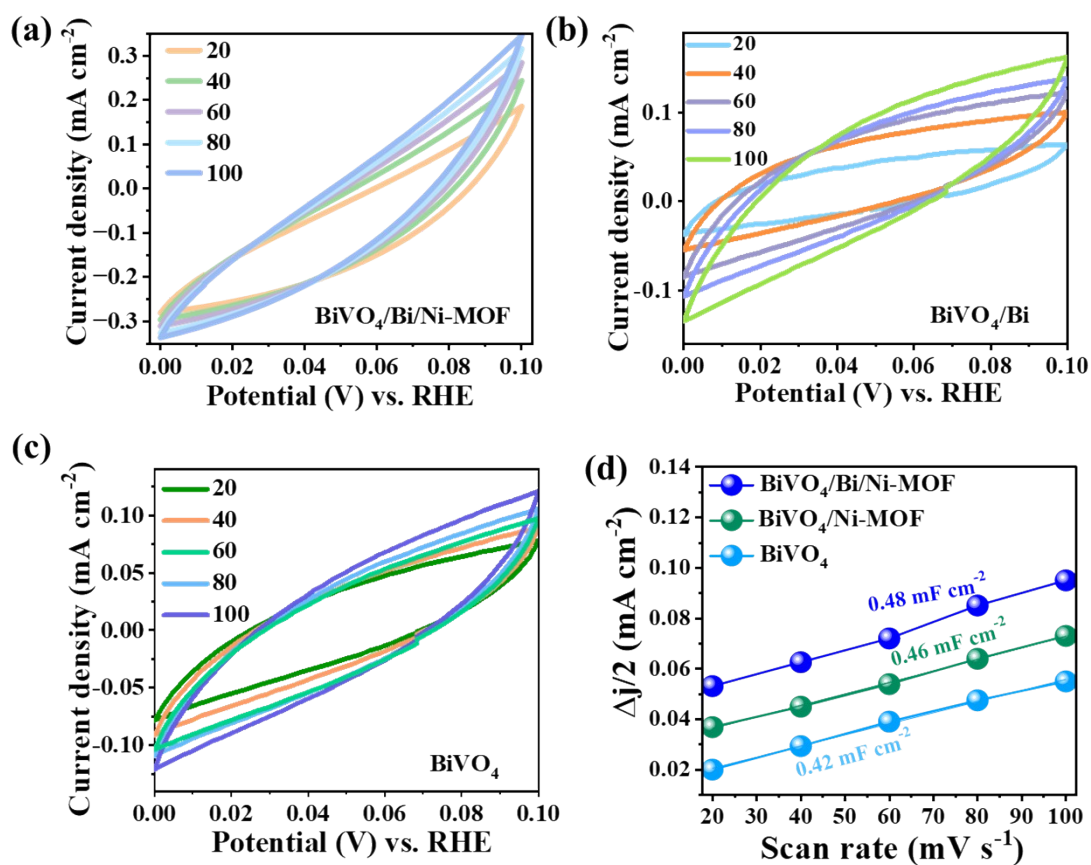

**Figure S11.** Electrochemical capacitive current in the non-faradaic potential range of 0 V to 0.1 V vs. RHE, used to determine the double-layer capacitance ( $C_{dl}$ ) of (a) BiVO<sub>4</sub>/Bi/Ni-MOF, (b) BiVO<sub>4</sub>/Bi, and (c) BiVO<sub>4</sub> in the dark, (d) plots for the determination of  $C_{dl}$ .

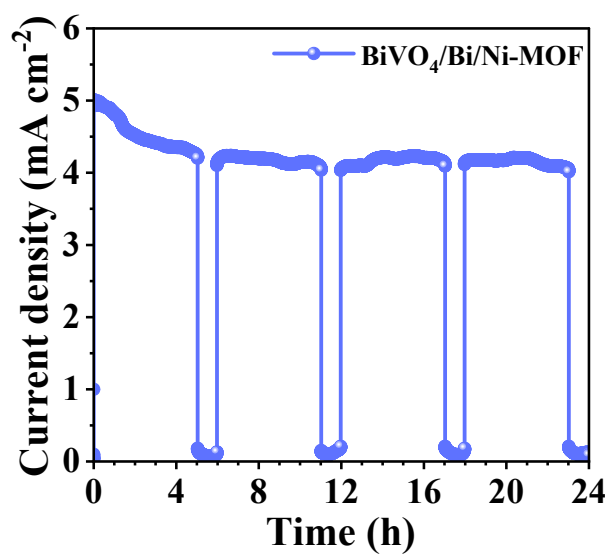

**Figure S12.** Chronoamperometry study of BiVO<sub>4</sub>/Bi/Ni-MOF photoanode under illumination and dark at 1.23 V vs. RHE (5 h light, 1 h dark).

**Table S2.** Comparison of photoelectrochemical activity of different BiVO<sub>4</sub>-based photoanodes.

| Photoanode                                        | Cocatalyst                                                           | Current density<br>(mA cm <sup>-2</sup> )<br>@ 1.23 V <sub>RHE</sub> | ABPE (%)                      | IPCE (%)        | Ref.      |
|---------------------------------------------------|----------------------------------------------------------------------|----------------------------------------------------------------------|-------------------------------|-----------------|-----------|
| BiVO <sub>4</sub> /Bi                             | Ni-MOF                                                               | 4.76                                                                 | 2.01% @ 0.59 V <sub>RHE</sub> | 62% @ 420 nm    | This work |
| BiVO <sub>4</sub>                                 | Ni-MOF                                                               | 2.77                                                                 | 1.48% @ 0.58 V <sub>RHE</sub> | 49% @ 420 nm    | This work |
| BiVO <sub>4</sub>                                 | 5% Rh:SrTiO <sub>3</sub>                                             | 0.8                                                                  | -                             | 12% @ 450 nm    | 5         |
| BiVO <sub>4</sub>                                 | FeO <sub>x</sub>                                                     | 1.1                                                                  | -                             | 21% @ 380 nm    | 6         |
| BiVO <sub>4</sub>                                 | CoMnZn-LDH                                                           | 1.1                                                                  | 0.27% @ 0.21 V <sub>RHE</sub> | 58% @ 380 nm    | 7         |
| BiVO <sub>4</sub>                                 | CoPi                                                                 | 1.1                                                                  | -                             |                 | 8         |
| BiVO <sub>4</sub>                                 | NiO <sub>x</sub>                                                     | 0.5                                                                  | -                             | 43% @ 450 nm    | 9         |
| W:BiVO <sub>4</sub>                               | CoPi                                                                 | 1.5                                                                  | -                             | 42% @ 420 nm    | 10        |
| V <sub>2</sub> O <sub>5</sub> /BiVO <sub>4</sub>  | NiOOH                                                                | 1.2                                                                  | -                             | 21% @ 425 nm    | 11        |
| Fe <sub>2</sub> O <sub>3</sub> /BiVO <sub>4</sub> | NiFe-LDH                                                             | 1.7                                                                  | -                             | 35% @ 400 nm    | 12        |
| W:BiVO <sub>4</sub>                               | Ni-bicarbonate                                                       | 2.1                                                                  | -                             | 44% @ 440 nm    | 13        |
| BiVO <sub>4</sub>                                 | FeOOH                                                                | 2.1                                                                  | -                             | -               | 14        |
| BiVO <sub>4</sub>                                 | Co <sub>2</sub> N <sub>0.67</sub>                                    | 2.2                                                                  | -                             | 50% @ 450 nm    | 15        |
| BiVO <sub>4</sub> /BiOBr                          | -                                                                    | 2.69                                                                 | 0.26% @ 0.58 V <sub>RHE</sub> | 51% @ 340 nm    | 16        |
| BiVO <sub>4</sub>                                 | CoPi                                                                 | 2.3                                                                  | -                             | -               | 17        |
| BiVO <sub>4</sub>                                 | La <sub>0.2</sub> Co <sub>0.2</sub> Ce <sub>0.6</sub> O <sub>x</sub> | 2.4                                                                  | -                             | -               | 18        |
| BiVO <sub>4</sub> /CdS                            | NiCo-LDH                                                             | 2.7                                                                  | 1.24% @ 0.62 V <sub>RHE</sub> | 35.89% @ 420 nm | 19        |
| BiVO <sub>4</sub> /TiO <sub>2</sub>               | IrCOOH                                                               | 2.8                                                                  | -                             | 58% @ 460 nm    | 20        |
| BiVO <sub>4</sub>                                 | MnCo <sub>2</sub> O <sub>4</sub>                                     | 2.8                                                                  | 1.1% @ 0.7 V <sub>RHE</sub>   | 25.6% @ 460 nm  | 21        |
| Zr:BiVO <sub>4</sub>                              | AgNiOH Pi                                                            | 3.2                                                                  | -                             | 42% @ 460 nm    | 22        |
| BiVO <sub>4</sub>                                 | LaFe <sub>0.5</sub> Co <sub>0.5</sub> O <sub>3</sub>                 | 3.2                                                                  | -                             | -               | 23        |
| BiVO <sub>4</sub>                                 | CuMTZ                                                                | 3.32                                                                 | 1.04% @ V <sub>RHE</sub>      | 92% @ 400 nm    | 24        |
| BiVO <sub>4</sub>                                 | 2D Ti <sub>3</sub> C <sub>2</sub> T <sub>x</sub> flakes              | 3.5                                                                  | 0.78% @ 0.87 V <sub>RHE</sub> | 58% @ 430 nm    | 25        |
| BiVO <sub>4</sub>                                 | Co-salophen                                                          | 3.9                                                                  | 1.09% @ 0.7 V <sub>RHE</sub>  | 89% @ 430 nm    | 26        |
| BiVO <sub>4</sub> /Black P                        | NiOOH                                                                | 4.3                                                                  | -                             | -               | 27        |
| Borate-BiVO <sub>4</sub>                          | NiFeV LDH                                                            | 4.6                                                                  | 1.85% @ 0.62 V <sub>RHE</sub> | 80% @ 380 nm    | 28        |
| BiVO <sub>4</sub>                                 | FeCoO <sub>x</sub>                                                   | 4.8                                                                  | 1.16% @ 0.84 V <sub>RHE</sub> | 86% @ 460 nm    | 29        |
| BiVO <sub>4</sub> /SnO <sub>x</sub>               | Co <sub>4</sub> O <sub>4</sub> /partially oxidized graphene          | 5.9                                                                  | 2.3% @ 0.6 V <sub>RHE</sub>   | 30% @ 460 nm    | 30        |
| BiVO <sub>4</sub> /C <sub>3</sub> N <sub>4</sub>  | FeOOH                                                                | 5.89                                                                 | 2.48% @ 0.6 V <sub>RHE</sub>  | 85% @ 460 nm    | 31        |
| BVO/BiVO <sub>4</sub>                             | NiFeO <sub>x</sub>                                                   | 3.40                                                                 | 2.0% @ 0.7 V <sub>RHE</sub>   | 60% @ 470 nm    | 32        |
| BiVO <sub>4</sub> /Sn:WO <sub>3</sub>             | NiMoO <sub>4</sub>                                                   | 2.06                                                                 | 0.52% @ 0.8 V <sub>RHE</sub>  | 38.3% @ 450 nm  | 33        |

## References

1. K. H. Ye, H. Li, D. Huang, S. Xiao, W. Qiu, M. Li, Y. Hu, W. Mai, H. Ji and S. Yang *Nat. Commun.*, 2019, **10**, 3687.
2. L. Bai, W. Yi, J. Chen, B. Wang, Y. Tian, P. Zhang, X. Cheng, J. Si, X. Hou and J. Hou, *ACS Appl. Mater. Interfaces*, 2022, **14**, 25050–25064.
3. A. Yadav, T. Ansari, P. Mannu, B. Singh, A. K. Singh, Y. C. Huang, V. Kumar, S. Singh, C. L. Dong and A. Indra, *J. Mater. Chem. A*, 2024, **12**, 29072–29080.
4. T. Wang, K. Song, H. Liu, H. Li, Y. Zhang, W. Ren, R. Zhang, K. Li, F. Hen, Z. Qin and H. Hou, *J. Chem. Eng*, 2025, **509**, 161333.
5. Y. Zhang, Y. Li, D. Ni, Z. Chen and X. Wang, *Adv. Funct. Mater.* 2019, **29**, 1902101.
6. H. Saada, R. Abdallah, B. Fabre, D. Floner, S. Fryars, A. Vacher, V. Dorcet, C. Meriadec, S. A. -Girard and G. Loget, *ChemElectroChem*, 2019, **6**, 613–617.
7. T. G. Vo, Y. Taia, and C.Y. Chiang, *J. Catal.*, 2019, **370**, 1–10.
8. K. Nie, S. Kashtanov, Y. Wei, Y. S. Liu, H. Zhang, M. Kapilashrami, Y. Ye, P.-A. Glans, J. Zhong, L. Vayssieres, X. Sun and J. Guo, *Nano Energy*, 2018, **53**, 483–491.
9. L. Yongqi and J. Messinger, *Phys. Chem. Chem. Phys.*, 2014, **16**, 12014–12020.
10. D. K. Zhong, S. Choi, Daniel and R. Gamelin, *J. Am. Chem. Soc.* 2011, **133**, 45, 18370–18377.
11. A. Maheswari, K. S. Ahn and S. H. Kang, *Int. J. Hydrog. Energy*, 2019, **44**, 10, 4656–4663.
12. S. Baia, H. Chua, X. Xiang, R. Luoa, J. Hea and A. Chen, *Chem. Eng. J*, 2018, **350**, 148–156.
13. S. K. Pilli, K. Summers and D. Chidambaram, *RSC Adv.*, 2015, **5**, 47080–47089.
14. S. L. Chen, L.Y. Lin, and Y. S. Chen, *Electrochim. Acta*, 2019, **295**, 507–513.
15. X. Wan, J. Su and L. Guo, *Eur. J. Inorg. Chem.* 2018, **22**, 2557–2563.
16. L. Shuai, L. Tian, X. Huang, J. Dou, J. Yu and X. Chen, *Int. J. Hydrogen Energy*, 2024, **88**, 19–28.
17. Y. Ma, A. Kafizas, S. R. Pendlebury, F. Le Formal and J. R. Durran, *Adv. Funct. Mater.*, 2016, **26**, 4951–4960.
18. D. Guevarra, A. Shinde, S. K. Suram, I. D. Sharp, F. M. Toma, J. A. Haber and J. M. Gregoire, *Energy Environ. Sci.*, 2016, **9**, 565–580.
19. S. Bai, Q. Li, J. Han, X. Yang, X. Shu, J. Sun, L. Sun, R. Luo, D. Li and A. Chen, *Int. J. Hydrog. Energy*, 2019, **44**, 45, 24642–24652.
20. M. Kan, D. Xue, A. Jia, X. Qian, D. Yue, J. Jia and Y. Zhao, *Appl. Catal. B*, 2018, **225**, 504–511.
21. D. Xu, T. Xia, H. Xu, W. Fan and W. Shi, *Chem. Eng. J.*, 2020, **392**, 124838.
22. M. N. Shaddad, P. Arunachalam, A. A. Alothman, A. M. Beagan, M. N. Alshalwi and A. M. A. Mayouf, *J. Catal.*, 2019, **371**, 10–19.
23. Y. Gao, G. Yan, Y. Dai, X. Li, J. Gao, N. Li, P. Qiu and L. Ge, *ACS Appl. Mater. Interfaces*, 2020, **12**, 15, 17364–17375.
24. J. -W. Ji, L. -J. Zhang, H. -C. Wang, Y. -X. Duan, X. -Z. Yue, J.-H. Chen and S. -S. Yi, *Chem. Eng. J.*, 2024, 484, 149597.
25. D. Yan, X. Fu, Z. Shang, J. Liu and He. Luo, *J. Chem. Eng.*, 2019, **361**, 853–861.

26. Y. Liu, Y. Jiang, F. Li, F. Yu, W. Jianga and L. Xia, *J. Mater. Chem. A*, 2018, **6**, 10761–10768.
27. K. Zhang, B. Jin, C. Park, Y. Cho, X. Song, X. Shi, S. Zhang, W. Kim, H. Zeng, and J. H. Park, *Nat. Commun.*, 2019, **10**, 2001.
28. Q. Meng, B. Zhang, H. Yang, C. Liu, Y. Li, A. Kravchenko, B. Zhang, H. Yang, C. Liu, Y. Li, X. Sheng, L. Fan and L. Sun, *Mater. Adv.*, 2021, **2**, 4323–4332.
29. S. Wang, T. He, J. H. Yun, Y. Hu, M. Xiao, M. Xiao, A. Du and L. Wang, *Adv. Funct. Mater.* 2018, **28**, 1802685.
30. S. Ye, W. Shi, Y. Liu, D. Li, H. Yin, H. Chi, Y. Luo, N. Ta, F. Fan, X. Wang, and C. Li, *J. Am. Chem. Soc.*, 2021, **143**, 12499–12508.
31. S. Xia, F. Xu and B. Weng, *J. Mater. Chem. A*, 2024, **12**, 4635–4642.
32. Z. Xie, D. Chen, J. Zhai, Y. Huang and H. Ji, *Appl. Catal. B*, 2023, **334**, 122865.
33. H. T. Htet, Y. Jung, Y. Kim and S. Lee, *ACS Appl. Mater. Interfaces*, 2024, **16**, 52383–52392.
